1 **The SARS-CoV-2 transcriptome and the dynamics of the S gene furin cleavage site in**  
2 **primary human airway epithelia**

3  
4  
5 Wei Zou<sup>1§</sup>, Min Xiong<sup>2§</sup>, Siyuan Hao<sup>2</sup>, Elizabeth Yan Zhang-Chen<sup>3</sup>, Nathalie Baumlin<sup>4</sup>, Michael  
6 D. Kim<sup>4</sup>, Matthias Salathe<sup>4</sup>, Ziyang Yan<sup>5#</sup>, and Jianming Qiu<sup>2#</sup>  
7  
8  
9

10 <sup>1</sup>Department of Microbiology and Immunology  
11 University of Michigan  
12 Ann Arbor, MI 48109  
13

14 <sup>2</sup>Department of Microbiology, Molecular Genetics and Immunology  
15 <sup>4</sup>Department of Internal Medicine  
16 University of Kansas Medical Center  
17 Kansas City, KS 66160  
18

19 <sup>3</sup>GeneGoCell Inc.  
20 San Diego, CA 92121  
21

22 <sup>5</sup>Department of Anatomy and Cell Biology  
23 University of Iowa  
24 Iowa City, IA 52242  
25  
26  
27  
28

29 Running head: SARS-CoV-2 transcriptome and the dynamics of the FCS  
30  
31  
32

33 Keywords: SARS-CoV-2, transcriptome, furin cleavage site, human airway epithelia  
34

35 §Contributed equally  
36  
37  
38  
39  
40

41 **#Corresponding author**

42 Jianming Qiu  
43 MSN 3029, 3901 Rainbow Blvd.  
44 Kansas City, KS 66160  
45 Phone: (913) 588-4329  
46 E-mail: [jqiu@kumc.edu](mailto:jqiu@kumc.edu)  
47 Or Ziyang Yan  
48 1-111 BSB, 51 Newton Road  
49 Iowa City, IA 52242  
50 Phone: (319) 335-9855  
51 E-mail: [ziyang-yan@uiowa.edu](mailto:ziyang-yan@uiowa.edu)

52  
53  
54  
55  
56  
57  
58  
59  
60  
61  
62  
63  
64  
65  
66  
67  
68  
69  
70  
71  
72  
73  
74  
75  
76  
77

## Abstract

The novel severe acute respiratory syndrome coronavirus-2 (SARS-CoV-2) caused the devastating ongoing coronavirus disease-2019 (COVID-19) pandemic which poses a great threat to global public health. The spike (S) polypeptide of SARS-CoV-2 consists of the S1 and S2 subunits and is processed by cellular proteases at the S1/S2 boundary. The inclusion of the 4 amino acids (PRRA) at the S1/S2 boundary forms a furin cleavage site (FCS), <sup>682</sup>RRAR↓S<sup>686</sup>, distinguishing SARS-CoV-2 from its closest relative, the SARS-CoV. Various deletions surrounding the FCS have been identified in patients. When SARS-CoV-2 propagated in Vero cells, the virus acquired various deletions surrounding the FCS. In the present study, we studied the viral transcriptome in SARS-CoV-2 infected primary human airway epithelia (HAE) cultured at an air-liquid interface (ALI) with an emphasis on the viral genome stability at the S1/S2 boundary using RNA-seq. While we found overall the viral transcriptome is similar to that generated from infected Vero cells, we identified a high percentage of mutated viral genome and transcripts in HAE-ALI. Two highly frequent deletions were found at the S1/S2 boundary of the S gene: one is a deletion of 12 amino acids, <sup>678</sup>TNSPRRAR↓SVAS<sup>689</sup>, which contains the FCS, another is a deletion of 5 amino acids, <sup>675</sup>QTQTN<sup>679</sup>, which is two amino acids upstream of the FCS. Further studies on the dynamics of the FCS deletions in apically released virions revealed that the selective pressure for the FCS maintains the S gene stability in HAE-ALI but with exceptions, in which the FCS deletions are remained at a high rate. Thus, our study presents evidence for the role of unique properties of human airway epithelia in the dynamics of the FCS region during infection of human airways, which is donor-dependent.

78

## Introduction

79

80

81

82

83

84

85

86

87

The ongoing coronavirus disease-2019 (COVID-19) outbreak, caused by the novel severe acute respiratory syndrome coronavirus-2 (SARS-CoV-2), poses a great threat to global public health with a devastating mortality (1-4). The virus has spread with unprecedented speed and has infected >100 million people worldwide, causing so far >2 million deaths. The efficacy of the only United States Food and Drug Administration (FDA) approved drug, VEKLURY (remdesivir), to treat COVID-19 patients is limited to early phases of the disease and is supportive (5). Ongoing rollout of the two mRNA-based COVID-19 vaccines approved by the FDA under an emergency use authorization, with more vaccines to follow soon, is the hope to prevent COVID-19 and contain the virus (6).

88

89

90

91

92

93

94

95

96

SARS-CoV-2 phylogenetically belongs to the genus *Betacoronavirus* of the family *Coronaviridae* (7,8), and is closely related to the previously identified severe acute respiratory syndrome coronavirus (SARS-CoV) with an identity of 79% in genome sequence (9,10). SARS had an outbreak in 2002-2003 (11,12). The genome organization of SARS-CoV-2 is the same as other betacoronaviruses. It has six major open reading frames (ORFs) arranged in order from the structured 5' untranslated region (UTR) to 3' UTR (13,14): replicases (ORF1a and ORF1b), spike (S), envelope (E), membrane (M), and nucleocapsid (N). In addition, at least seven ORFs encoding accessory proteins (3a, 6, 7a, 7b, 8, 9a, and 9b) are interspersed between the structural protein genes (10,15).

97

98

99

100

101

102

103

The replication and transcription of SARS-CoV-2 largely resemble that of the SARS-CoV (15,16). The accepted model for coronavirus transcription indicates that all viral mRNAs have a common 5'-leader (L) sequence or the 5'-cap structure at the 5'UTR, and a common poly(A) tail at the 3UTR (15,17-19). The highly conserved leader sequences contain the transcription regulatory sequences (TRS) which play an important role in viral RNA transcription (18-20). Upon cell entry of the virus, the incoming positive-sense genomic RNA (+gRNA) subjects it to immediate translation of two large ORFs, ORF1a and ORF1b, for viral nonstructural proteins,

104 which form the viral replication and transcription complex (RTC) (21). In the complex, the viral  
105 +gRNA serves as the template for the production of negative-sense (-)gRNA and sub-genome  
106 RNA (-sgRNA) intermediates, which in turn serve as the templates for the synthesis of +gRNA  
107 and +sgRNAs (22). The positive-sense viral RNAs are the mRNAs used for the translations of at  
108 least 20 viral nonstructural proteins and 5 structural proteins, spike protein S, envelope protein  
109 E, membrane protein M, and nucleocapsid protein N (21). Next, the newly synthesized +gRNA  
110 is encapsidated by the N protein to assemble progeny virions with other viral structural proteins,  
111 M, E, and S (21).

112 Most SARS-CoV-2 structural and nonstructural proteins share greater than 85% identity  
113 in protein sequence with SARS-CoV, whereas their S proteins only share an identity of  
114 approximately 77% (2). S protein consists of two subunits, S1 and S2, and is a key glycoprotein  
115 responsible for receptor binding and determining the host tropism, pathogenicity, and  
116 transmissibility (23,24). It forms a homotrimer on the virion surface and triggers viral entry into  
117 target cells via binding of the S1 subunit to its cognate receptor, angiotensin-converting enzyme  
118 2 (ACE2) (2,25,26). One significant difference among S proteins of SARS-CoV-2, SARS-CoV,  
119 and other bat SARS-like coronaviruses, such as BtCoV-RaTG13, is the addition of 4 amino  
120 acids, PRRA, at the S1/S2 boundary (24). This insertion forms a polybasic residue motif,  
121 assembling a furin cleavage site (FCS), RRAR↓S, which is highly related to the furin cleavage  
122 consensus sequence RX[K/R]R (X, any amino acid) (27). The absence of the FCS in the other  
123 betacoronaviruses suggests the insertion of PRRA is a key factor in the virulence of SARS-CoV-  
124 2, which has been shown to broaden cell tropism, transmissibility, and pathogenicity of the virus  
125 (28-30).

126 Viral transcriptomes of SARS-CoV-2 have been studied by several groups but only in  
127 infected Vero cells (15,17), which revealed quick mutations in the S1/S2 boundary of the S  
128 gene, including the loss of the FCS and the immediately adjacent amino acids upstream or  
129 downstream of the FCS. The loss of the FCS has been identified in progeny virions replicated in

130 Vero cells (17,31-34). The mutant viruses were stable, quickly took over the wild-type (WT)  
131 virus, and became the dominant population during passaging. Of note, various deletions  
132 surrounding the FCS have been identified in patients. This raises the question of how the FCS  
133 region deletions are selected in human airways.

134 In this study, we used RNA-seq to analyze the viral transcriptome of SARS-CoV-2 in the  
135 infected human airway epithelia (HAE) cultured at an air-liquid interface (HAE-ALI), which  
136 mimics natural viral infection of human airways (35,36). While the viral transcriptome overall  
137 recapitulated that in Vero cells, we discovered that there is a selective pressure in HAE-ALI to  
138 suppress the deletions at the S1/S2 boundary and that this pressure appears individual donor  
139 dependent. We identified two FCS region deletions that are strikingly amplified in two HAE-ALI  
140 cultures after 2-3 weeks of infection, whereas these deletions were suppressed in five other  
141 HAE-ALI cultures.

142

## 143 **Materials and Methods**

### 144 **Viruses.**

145 SARS-CoV-2 (NR-52281), isolate USA-WA1/2020 (Batch no.: 70034262), was obtained  
146 from BEI Resources (Manassas, VA) and designated as P0 passage. The virus used for  
147 infections of HAE-ALI was propagated once in Vero-E6 cells, designated as P1 passage.  
148 Viruses were titrated by plaque assays on Vero-E6 cells and stored at  $-80^{\circ}\text{C}$  as previously  
149 described (36). A biosafety protocol to work on SARS-CoV-2 infection in the biosafety level-3  
150 (BSL3) lab was approved by the Institutional Biosafety Committee of the University of Kansas  
151 Medical Center.

152

### 153 **HAE-ALI cultures.**

154 Primary HAE-ALI cultures, lots of B2-20, B3-20, B4-20, B9-20, B15-20, and B16-20,  
155 were prepared from bronchial airway epithelial cells isolated from various donors. They were

156 obtained from the Cells and Tissue Core of the Center for Gene Therapy, University of Iowa and  
157 polarized in Transwell inserts (0.33 cm<sup>2</sup>; Costar, Corning, Tewksbury, WA). L209 and KC19  
158 HAE-ALI cultures were prepared from propagated bronchial airway cells of the L209 and KC19  
159 donors provided by the Department of Internal Medicine, University of Kansas Medical Center.  
160 They were polarized on Transwell inserts (1.1 cm<sup>2</sup>; Costar, Corning). The HAE-ALI cultures that  
161 had transepithelial electrical resistance (TEER) of > 1,000 Ω·cm<sup>2</sup>, determined with an epithelial  
162 volt-ohm meter (MilliporeSigma, Burlington, MA), were used for infections.

163

#### 164 **Virus infections.**

165 Polarized HAE-ALI cultures were infected with SARS-CoV-2 at a multiplicity of infection  
166 (MOI) of 0.2 or 2. The inoculum of 100 μl or 300 μl was apically applied to the 0.33 cm<sup>2</sup> or 1.1  
167 cm<sup>2</sup> Transwell inserts with an incubation period of 1 h at 37°C and 5% CO<sub>2</sub>. After aspiration of  
168 the inoculum, the apical surface of the insert was washed with 100 μl (or 300 μl) of Dulbecco's  
169 phosphate-buffered saline (D-PBS; Corning, Tewksbury, WA) three times to maximally remove  
170 the unbound viruses. The HAE-ALI cultures were then placed back into the incubator at 37°C  
171 and 5% CO<sub>2</sub>. To collect the apically released progeny from infected cultures, 100 μl (or 300 μl)  
172 of D-PBS was added to the apical chamber for 30 min at 37°C and 5% CO<sub>2</sub>. Thereafter, the  
173 apical wash was pipetted carefully from the apical chamber.

174

#### 175 **Immunofluorescence assay.**

176 The membrane of the infected HAE-ALI was cut out and fixed with 4%  
177 paraformaldehyde in PBS at 4°C overnight. The fixed membrane was washed in PBS for 5 min  
178 three times and then split into several pieces for whole-mount immunostaining. Following  
179 permeabilization with 0.2% Triton X-100 for 15 min at room temperature, the slide was  
180 incubated with a rabbit monoclonal anti-SARS-CoV-2 nucleocapsid (NP) (# 40143-R001;  
181 SinoBiological US, Wayne, PA) at a dilution of 1:25 in PBS with 2% fetal bovine serum for 1 h at

182 37°C. After washing, the slide was incubated with a rhodamine-conjugated secondary antibody,  
183 followed by staining of the nuclei with DAPI (4',6-diamidino-2- phenylindole).

184

#### 185 **RNA extraction.**

186 For total RNA extraction, 4 Transwell inserts of HAE-ALI cultures were dissolved in 1 ml  
187 of TRIzol Reagent (ThermoFisher, Waltham, MA), following manufacturer's instructions. Viral  
188 RNA was isolated from the virions in apical washes. 50 µl of apical wash was used for the  
189 extraction of nuclease digestion-resistant viral RNA using the Quick-RNA Viral kit (#R1035;  
190 Zymo Research, Irvine, CA), as described previously (36). The final RNA samples were  
191 dissolved in 50 µl of deionized H<sub>2</sub>O and quantified for concentrations using a microplate reader  
192 (Synergy H, BioTek).

193

#### 194 **RNA-seq.**

195 For viral transcriptome, total RNA was extracted from HAE-ALI cultures infected with  
196 SARS-CoV-2 at an MOI of 0.2 and 2, respectively, or mock infected at 4 dpi. After RNA quality  
197 control and reverse transcription, DNA nanoball sequencing (DNSeq) was performed at BGI  
198 Genomics (Cambridge, MA). Briefly, RNA samples were tested using an Agilent 2100  
199 Bioanalyzer (Agilent RNA 6000 Nano Kit). Samples with an RNA Integrity Number (RIN) of ≥ 8.0  
200 were chosen for library construction. rRNA was removed from the total RNA samples by using  
201 RNase H or Ribo-Zero method. Then, samples were fragmented in a fragmentation buffer for  
202 thermal fragmentation to 130-160 nucleotides (nts). First-strand cDNA was generated by First  
203 Strand Mix, then Second Strand Mix was added to synthesize the second-strand cDNA. The  
204 reaction product was purified by magnetic beads and end-repaired by addition of adaptors,  
205 followed by several rounds of PCR amplification to enrich the cDNA fragments. The PCR  
206 products were then purified and subjected to library quality control on the Agilent Technologies  
207 2100 bioanalyzer. The double stranded PCR products were heat denatured and circularized by

208 the splint oligo sequence. The single strand circle DNA (ssCir DNA) were formatted as the final  
209 library. The final library was amplified with phi29 to make DNA nanoball (DNB) which have more  
210 than 300 copies of one molecule. The DNBs were load into the patterned nanoarray and 2 ×  
211 100 paired-end reads were generated in the way of combinatorial Probe-Anchor Synthesis  
212 (cPAS).

213 For RNA-seq of the viral RNAs, the apical washes were collected from infected HAE-ALI  
214 cultures at the indicated times (days post-infection, dpi; **Tab. 3**), and were extracted for viral  
215 RNA as described above. For library preparation, the stranded-RNA seq kit (Thermo Fisher)  
216 was used following the manufacturer's protocol. The rRNA depletion step was added for the  
217 library preparation. The Illumina sequencer NextSeq550 was used to generate pair-end 2 × 150  
218 reads at GeneGoCell Inc. (San Diego, CA).

219

#### 220 **PCR amplicon-seq.**

221 For sequencing the FCS region of the S gene, viral RNA extracted from the apical  
222 washes was reverse-transcribed using AMV (Promega, Madison, WI). A 384-nt sequence  
223 covering the S gene FCS region (nt 23,487-23,870) was amplified by PCR of 20 cycles using  
224 the primers containing the adaptor sequences: Forward: 5'-ACA CTC TTT CCC TAC ACG ACG  
225 CTC TTC CGA TCT TTT TCA AAC ACG TGC AGG C-3', and Reverse: 5'-GAC TGG AGT TCA  
226 GAC GTG TGC TCT TCC GAT CTT CCA GTT AAA GCA CGG TTT AAT-3'. The PCR products  
227 were analyzed on 1.5% agarose and excised for purification. The purified DNA samples were  
228 quantified on a microplate reader (Synergy LX, BioTek, Winooski, VT), and 500 ng of each DNA  
229 sample (20 ng/μl) was sent for PCR amplicon-seq (AMPLICON-EZ) at GENEWIZ, Inc. (South  
230 Plainfield, NJ).

231

#### 232 **Bioinformatic analyses.**



233 **Total cellular DNBseq data (BGI) and PCR-amplicon-seq (GENEWIZ):** The reads  
234 were aligned to the reference SARS-CoV-2 Wuhan-Hu-1 isolate genome (GenBank accession  
235 no: MN908947) using BWA v0.7.5a-r405. Sequencing read coverage was calculated using  
236 bedtools genomecov of version 2.27.1. We used STAR (2.7.3a) to identify the junction-spanning  
237 reads as described previously except that we set the minimal size of deletions as 10 (15).

238 **Viral RNA-seq data (GeneGoCell Inc.):** Raw sequence reads (fastq files) were  
239 processed through the following steps by the Genenius NGS bioinformatics pipeline (v2.1). Low-  
240 quality reads were removed using quality score threshold 25 (Q25). The resulting fastq files  
241 were analyzed by FastQC v0.10.1 for quality control (QC). Reads were aligned to the reference  
242 genome Wuhan-Hu-1. The alignment results were analyzed using the proprietary GeneGoCell  
243 program for variant calling on the target sites as follows: 1) Each read pair was processed to  
244 report the variant in the read; 2) Each variant's allele frequency (AF) was calculated based on #  
245 of variant reads / total reads covering the region (both variant and non-variant); 3) Variants with  
246  $\geq 1\%$  AF and  $\geq 3$  variant reads were reported in a variant calling file (vcf). The output of the  
247 bioinformatics workflow was collected and further organized/processed in Microsoft Office 365.

248 **Data deposition:** All the RNA-seq and PCR amplicon-seq data have been deposited in  
249 NIH-sponsored BioProject database, PRJNA698337  
250 (<https://dataview.ncbi.nlm.nih.gov/object/PRJNA698337?reviewer=k4gtr6eundj03jnpocrj62tq1un>).

251

## 252 **Results**

253 **To determine the SARS-CoV-2 transcriptome in SARS-CoV-2 infected HAE-ALI cultures.**

254 HAE-ALI<sup>B2-20</sup> cultures were infected with SARS-CoV-2 at an MOI of 0.2 or 2, or mock  
255 infected. At 4 days post-infection (dpi), immunofluorescence assay for the SARS-CoV-2 N  
256 protein expression revealed effective SARS-CoV-2 infection in these cultures, with ~10% and  
257 ~30% of cells positive in the infections at MOIs of 0.2 and 2, respectively (**Fig. 1**). This result  
258 was similar to our previous observation (36).

259 Total RNA samples were extracted from infected HAE-ALI cultures at 4 dpi and  
260 subjected to reverse transcription, followed by DNA nanoball sequencing. An average total  
261 reads of 18.27% and 26.54% were mapped to the SARS-CoV-2 reference genome (Wuhan-Hu-  
262 1 isolate; MN908947) in the groups of MOI 0.2 and MOI 2, respectively (**Tab. 1**). No significant  
263 difference was observed in the total reads in the two groups. Notably, the RNA-seq data  
264 obtained from SARS-CoV-2 infected Vero-E6 cells had up to 70% of the reads mapped to the  
265 viral genome (15), which was likely due to the high infectivity of Vero-E6 cells and that not all  
266 the cell types in HAE-ALI are permissive to the infection (36). Also, for the whole viral genome  
267 coverage, in contrast to the observation in SARS-CoV-2 infected Vero-E6 cells (15), we did not  
268 observe an obvious 5'-leader peak in the infected HAE cells (**Fig. 2**). Instead, we observed ~2-  
269 fold higher reads in the 3'-end than that in the 5'-end viral genome.

270 We further analyzed the viral sgRNA expression in infected HAE cells. Junction-  
271 spanning reads covering the 5'-leader and different sgRNAs were counted and analyzed  
272 (**Supplemental Material S1**). Different sgRNAs were abundantly expressed in infected HAE  
273 cells. As the negative-strand intermediates account only ~1 % as abundant as their positive  
274 sense counterparts (22,37), indicating most of the identified sgRNAs were +sgRNAs. N protein  
275 encoding RNA was the most abundantly expressed viral transcript and accounted for 23.11%  
276 and 16.93% of total junction-spanning reads in the groups of MOI 0.2 and MOI 2, respectively,  
277 followed by ORF3a, ORF7a, M, ORF8, S, E, ORF6 coding RNAs (**Fig. 3**). The junction-  
278 spanning reads associated with ORF7b and ORF9a/b were identified at a level of 0.01% or less  
279 of the total junction-spanning reads and were only identified in part of all the six samples in two  
280 MOI groups (**Supplemental Material S1**). In SARS-CoV-2 infected HAE cells, S RNA transcript  
281 was expressed at a ratio of ~2% of total junction-spanning reads in both groups (**Fig. 3**),  
282 compared to that of ~8% in Vero cells. We detected relatively higher level of ORF3a (~8%)  
283 transcript in SARS-CoV-2 infected HAE cells (**Fig. 3**), in contrast to 5.22% in infected Vero cells  
284 (15).

285           Interestingly, in all identified spanning-junction reads, only ~50% correlated to the  
286 canonical sgRNA transcripts in both MOI infection groups. The other half junction-spanning  
287 reads represent either reads covering 5'-leader sequence but with unexpected 3' sites located in  
288 the middle of annotated ORFs or reads covering between different ORFs or inside an ORF  
289 without 5'-leader sequence (**Supplemental Material S1**). It's important to note that a lot of  
290 these noncanonical junction-spanning patterns were supported by only one read from the RNA-  
291 seq data, indicating that these noncanonical transcripts may arise from erroneous replicase  
292 activity.

293

#### 294 **Identification of deletions surrounding the furin cleavage site at S1/S2.**

295           Among the ~50% noncanonical junction-spanning reads, we identified a high abundant  
296 36-bp deletion, mut-del1, located at nt 23,594-23,629 spanning the FCS (**Fig. 4A**) that encodes  
297 aa <sup>678</sup>TNSPRRAR↓SVAS<sup>689</sup> (**Fig. 4B**, “↓” indicates cleavage). It displayed at frequencies of  
298 21.04% and 14.79% of total junction-spanning reads in MOI 0.2 and MOI 2 groups, respectively  
299 (**Tab. 2**). Another 15-bp deletion, mut-del2, located at nt 23,583-23,597, encoding aa  
300 <sup>675</sup>QTQTN<sup>679</sup> (**Fig. 4A**), just two amino acids ahead of the FCS. It accounted for 0.42% and  
301 15.11% of the total junction-spanning reads in MOI 0.2 and MOI 2 groups, respectively (**Tab. 2**).  
302 The ratio of mut-del1 is only slightly lower than the N sgRNA and nearly 10 times higher than  
303 the S sgRNA transcript, indicating a high fraction of this mutation comes from the viral genome  
304 (+gRNA).

305           To further reveal the ratio of the two deletions in total viral genome, the junction-  
306 spanning reads associated with the two deletions were normalized with the average reads  
307 covering the same deletions. The results showed that 69.02% and 20.02% of the viral reads  
308 related to this region contain the mut-del1 deletion, while 1.11% and 15.75% of this region  
309 contain mut-del2 deletion in MOI 0.2 and MOI 2 groups, respectively (**Tab. 2**). It should be noted  
310 that the total reads used for normalization include reads of both viral gRNA and sgRNAs. Thus,

311 here we were unable to distinguish the origin of these two deletions from the viral genome and  
312 viral RNA transcripts in these total cellular transcriptome data.

313 Except for these two highly abundant mut-del1 and mut-del2 deletions, we also observed  
314 a 21-bp FCS deletion at nt 23,595-23,615, encoding aa <sup>678</sup>TNSPRRA<sup>684</sup>, but only in the MOI 2  
315 group with 1.13% of the total junction-spanning reads, and a 39-bp deletion at the N-terminus of  
316 the S protein (nt 21,743-21,781 encoding aa <sup>61</sup>NVTWFHAIHVSGT<sup>73</sup>) with 0.27% and 0.60% of  
317 the total junction-spanning reads in MOI 0.2 and MOI 2 groups, respectively.

318 In addition to these deletions in S gene, we identified about 50 different in-frame or  
319 frameshift deletions in M encoding region that appeared in all six samples of both MOI groups,  
320 and there were even more deletions in M coding region that appeared in only a part of the six  
321 RNA samples (**Supplemental Material S1**). Although the ratio of single deletion was low, the 50  
322 deletion patterns that appeared in all 6 RNA samples had the ratios of 2.39% and 3.18% in MOI  
323 0.2 and MOI 2 groups, respectively, which is similar or even higher than the identified canonical  
324 junction-spanning reads related to M sgRNAs (**Fig. 3**). Notably, most of these identified deletion  
325 patterns of M gene also appeared in SARS-CoV-2 infected Vero cells (15). Whether these  
326 deletions produce functional M protein or affect the function of M protein warrant further studies.  
327 In SARS-CoV-2 infected Vero-E6 cells, a high ratio of 27-bp deletion in E gene (nt 26,257-  
328 26,283) was identified (15), which, however, was not found in infected HAE cells.

329

### 330 **Dynamics of the FCS region deletions in virions apically released from SARS-CoV-2** 331 **infected HAE-ALI cultures derived from various donors.**

332 To further investigate the FCS region deletions during SARS-CoV-2 infection of HAE  
333 cells, we infected HAE-ALI cultures generated from five different donors, B3-20 (MOI=0.2), B4-  
334 20 (MOI=2), B9-20 (MOI=2), L209 (MOI=0.2) and KC19 (MOI=0.2), and collected the progeny in  
335 the apical washes at different time points. The dynamics of apical virus releases of the HAE-ALI  
336 cultures of B3-20, B4-20, B9-20, and L209 have been described in our previous study (36). The

337 apical virus release kinetics of the HAE-ALI<sup>KC19</sup> is shown in **Fig. 5**. Viral RNA was prepared  
338 either for RNA-seq or for PCR amplicon-seq of a 384-nt sequence covering the FCS. Notably,  
339 mut-del1 was not significantly detected (<0.1%) in all the apically released viruses collected at  
340 >13 dpi (**Tab. 3**, Bx-20). Nevertheless, for viruses collected from HAE-ALI<sup>KC19</sup>, the mut-del2 was  
341 detected at a high level (20.75%<sup>RNA-seq</sup> and 20.98%<sup>RNA-seq</sup>) at 4 dpi and 13 dpi, respectively,  
342 which reached a close level of 41.79%<sup>PCR-seq</sup> at 21 dpi. Although the viruses derived from HAE-  
343 ALI<sup>B3-20</sup>, HAE-ALI<sup>L209</sup> and HAE-ALI<sup>B4-20</sup> contain a high level (23.17%, 30.33%, and 8.3%,  
344 respectively) of mut-del2 at 3 dpi, it decreased to a level of <2% at ≥17 dpi (**Tab. 3**, Bx-20).  
345 HAE-ALI<sup>B9-20</sup> did never produce significant mut-del2 (<0.1%).

346 Notably, SARS-CoV-2 isolate USA-WA1/2020 P0 stock provided by BEI was already  
347 passaged 4 times in Vero cells, and it was reported that there appeared significant  
348 heterogeneity at the S1/S2 boundary in Vero cell propagated virus (31). To verify this, we  
349 sequenced the viral RNA of P0 (the originally received vial) and P1 (passaged once in Vero-E6  
350 cells) virus stocks. The results showed that there was no detectable mut-del1 in the P0 stock  
351 but a high rate of 21.69%<sup>RNA-seq</sup> and 40.47%<sup>PCR-seq</sup> in the P1 stock. However, while there was ~2%  
352 of mut-del2 in the P0 stock, it only slightly increased to ~5% in the P1 stock. (**Tab. 3**, P0 and  
353 P1). These results confirmed that even though there was no or low level of mut-del1 and mut-  
354 del2 in the P0 stock, there was a high level of mut-del1 and a low level of mut-del2 in the P1  
355 stock, which we used for infection of all HAE-ALI cultures.

356 Taken together, the results demonstrated that the mut-del1 appears at a very low rate in  
357 all the HAE-ALI produced viruses at late time points of infection (≥17 dpi), which was confirmed  
358 by both RNA-seq and PCR amplicon-seq. Although the inoculum had the mut-del1 detected at a  
359 high frequent rate of 21.69%<sup>RNA-seq</sup> (40.47%<sup>PCR-seq</sup>), this deletion was obviously suppressed  
360 when the virus propagated in the HAE-ALI cultures. In addition, except for the viruses produced  
361 from HAE-ALI<sup>KC19</sup>, mut-del2 also appeared at a low detection rate during the course of infection  
362 (≥17 dpi) in various HAE-ALI cultures.

363

364 **FCS region deletions during SARS-CoV-2 infection of human airway epithelia are donor**  
365 **dependent.**

366 The above RNA-seq and PCR-seq results of apically released virions from five individual  
367 HAE-ALI cultures suggested a selective pressure in suppressing the deletions of the FCS region  
368 during SARS-CoV-2 propagation in human airway epithelia. The exception is the infection in  
369 HAE-ALI<sup>KC19</sup> cultures, which amplified the mut-del2 to a high level. To address the possibility of  
370 the donor dependency of the FCS region deletions, we infected HAE-ALI cultures generated  
371 from two additional donors B15-20 and B16-20, and collected both the viral progeny in apical  
372 washes at the early and late time points post-infection for PCR-seq. The apical washes from  
373 infected HAE-ALI<sup>B15-20</sup> and HAE-ALI<sup>B16-20</sup> had virus titers of  $> 10^6$  pfu/ml at both 3 dpi and 13 dpi,  
374 indicating the input inoculum replicated similarly in these two HAE-ALI cultures as in the others  
375 (**Fig. 5**) (36). The sequencing results of the apically released viruses from infected HAE-ALI<sup>B15-20</sup>  
376 showed that mut-del1 was detected at a rate of 31.87% at 3 dpi, which increased to a high level  
377 at 54.22% at 13 dpi (**Tab. 4**, B15-20/mut-del1). However, mut-del2 was barely detectable at a  
378 low rate (0.18%) at 3 dpi, and this rate remained very low at 0.69% at 13 dpi (**Tab. 4**, B15-  
379 20/mut-del2). For the viruses apically released from infected HAE-ALI<sup>B16-20</sup> cultures, only mut-  
380 del1 was detected at a rate of 6.81% at 3 dpi, which nearly disappeared (at rate of 0.08%) at 13  
381 dpi; whereas mut-del2 was detected at very low levels ( $<1\%$ ) at both 3 and 13 dpi (**Tab. 4**, B16-  
382 20). The suppression of mut-del1 in HAE-ALI<sup>B16-20</sup> cultures was similar as what observed in the  
383 previously tested five ALI cultures (**Tabl. 3**).

384 Together with the detection rates of the viruses produced from the infected HAE<sup>KC19</sup>-ALI  
385 cultures, the above results suggested that the probability of FCS region deletions is dependent  
386 on the HAE-ALI cultures made from airway epithelial cells of different donors. In contrast to the  
387 HAE-ALI<sup>KC19</sup> that produced a high rate of mut-del2, HAE-ALI<sup>B15-20</sup> tended to generate the viruses  
388 that have a high rate of the mut-del1 deletion.

389

390

## Discussion

391

392

393

394

395

396

397

398

399

400

401

402

403

404

405

406

407

408

409

410

411

412

413

414

In this study, we analyzed the transcriptome of SARS-CoV-2 in polarized human bronchial airway epithelia, an in vitro model mimicking the SARS-CoV-2 infection in human lower airways (35,36). We found that the transcriptome in HAE-ALI reflects more closely the viral transcriptome in the airways of COVID-19 patients, supporting that HAE-ALI is a physiologically relevant in vitro culture to study SARS-CoV-2. Neither RNA-seq data of clinical SARS-CoV-2 positive nasopharyngeal specimens nor RNA-seq of SARS-CoV-2 infected HAE-ALI showed the 5'-leader sequence read peak (38,39). In SARS-CoV-2 infected Vero-E6 cells, N sgRNAs accounted for up to 69% in total viral RNA transcripts, and S sgRNAs accounted for 8% of the total junction-spanning reads (15) (**Fig. 3**). Nevertheless, in HAE-ALI cultures, SARS-CoV-2 still expresses the abundant N protein transcript, and relatively low level of S gene mRNA. Of note, the overall sgRNA transcripts in infected HAE-ALI were mapped to only 50% of all the canonical sgRNAs, much lower than that in Vero cells (15), which is partially due to the high deletion rate of the FCS region derived from the inoculated virus (P1 stock, **Tab. 3**).

Among all the SARS-CoV-2 viral genes, S gene is the one most variable, in particular the S1/S2 junctional region, featuring the FCS. Increasing evidence has shown that the S1/S2 FCS region is highly unstable, and various deletions and mutations have been detected or isolated in SARS-CoV-2 infected Vero cells (17,31-34). A mutant with a 30-bp deletion, encoding aa <sup>679</sup>NSPRRAR↓SVA<sup>688</sup>, showed enhanced replication ability in Vero cells, and had the capability to dominate the genome population during passage in Vero cells (34). A 21-bp deletion encoding aa <sup>679</sup>NSPRRAR<sup>686</sup> were detected (>10%) in low (<2-3) passaged isolates (32). However, detection of the original clinical specimen where the mutant was derived and SARS-CoV-2 positive clinical specimens showed no such deletions (15-30 bp) in the FCS region (33), indicating that the mut-del1 or mut-del1-like (containing FCS) deletions are generated during the propagation in Vero cells. Apparently, SARS-CoV-2 is under strong

415 selection pressure in Vero cells to acquire adaptive mutations in the S protein. Nevertheless,  
416 mut-del2 (<sup>675</sup>QTQTN<sup>679</sup>) has not only been identified in Vero cell passaged isolates (40), but also  
417 in 3 of 68 clinical specimens (32), indicating that mut-del2 maybe clinically more important  
418 (relevant) than mut-del1.

419 The S protein as a part of the viral envelope facilitates viral entry into infected cells. The  
420 S1 subunit contains the receptor binding domain and the S2 domain mediates fusion of the viral  
421 envelope with a cellular membrane (23). The infectivity of SARS-CoV-2 necessitates the  
422 activation of S protein. There are two proteolytic activation events associated with S-mediated  
423 receptor binding and membrane fusion. The first is a priming cleavage that occurs at the S1/S2  
424 boundary, and the second is the obligatory triggering cleavage that occurs within the S2' site  
425 (**Fig. 4A**). The priming cleavage at S1/S2 boundary causes the conformation changes of the S1  
426 subunit for receptor binding and of the S2 subunit for conversion of a fusion competent form, by  
427 enabling the S protein to better bind receptors or expose the hidden S2' cleavage site. The  
428 cleavage at S2' triggers the fusion of the viral envelope with the host cell membrane (23).  
429 Cleavage by furin at the S1/S2 site is required for subsequent transmembrane serine protease 2  
430 (TMPRSS2)-mediated cleavage at the S2' site during viral entry into lung cells (41). However, a  
431 cathepsin B/L-dependent auxiliary activation pathway is available during infection of SARS-  
432 CoV-2 infection in TMPRSS2 negative cells (34,42), which is likely not dependent on the  
433 cleavage at S1/S2 (43). One important novel finding of our study is that HAE-ALI cultures  
434 prepared from human airway cells isolated from different donors selected different FCS  
435 deletions. While most (5/7) of the HAE-cultures (B3-20, B9-20, L209, and B16-20) strongly  
436 selected the FCS during virus replication (the FCS deletions only accounted <1% at 13 dpi),  
437 HAE-ALI<sup>KC19</sup> prefers selection of mut-del2 (<sup>675</sup>QTQTN<sup>679</sup>) (41.79%<sup>PCR-seq</sup> at 21 dpi), and HAE-  
438 ALI<sup>B15-20</sup> selected the mut-del1 (<sup>678</sup>TNSPRRRAR<sub>↓</sub>SVAS<sup>689</sup>) at a rate of 54.22%<sup>PCR-seq</sup> at 13 dpi.  
439 Although mut-del2 retains the FCS, deletion of QTQTN upstream of the FCS also prevented the  
440 cleavage (40). These mutants with amino acid deletions immediately upstream of FCS, like mut-



441 del2, or downstream (<sup>685</sup>RSV<sup>687</sup> or <sup>689</sup>SQS<sup>691</sup>) also showed significant defects in S protein  
442 processing (40,42). Both types of the FCS region deletions were unable to utilize the furin and  
443 TMPRSS2-mediated plasma membrane fusion entry pathway and exhibited a more limited  
444 range of cell tropism (42,44). This is substantiated by the fact that there were no FCS region  
445 deletions detected in SARS-CoV-2 propagated in TMPRSS2-expressing cells (42). Overall, we  
446 believe that human airway epithelial cells express ACE2 and TMPRSS2 (36,45-47), which plays  
447 an important role during S protein priming and viral entry, and the virus entry is mediated by the  
448 membrane fusion pathway. However, from two out of the seven HAE-ALI cultures tested in this  
449 study, the lack of suppression of the FCS region deletion was also found in apically released  
450 virions of the infected HAE-ALI cultures made from KC19 and B15-20 donors. Previously, we  
451 discovered that the SARS-CoV-2 infection in HAE-ALI resulted in periodic recurrent replication  
452 peaks of progeny (36). Since the cleavage at the S2' site by TMPRSS2 necessitates the priming  
453 cleavage at S1/S2, the accumulation of FCS mutations in the progeny during the infection in  
454 HAE-ALI<sup>B15-20</sup> and HAE-ALI<sup>KC19</sup> suggests they are more permissive to the infection of the FCS-  
455 deficient SARS-CoV-2 mutants than the other cultures. We speculate that epithelial cells from  
456 these two donors may express much less TMPRSS2, and therefore the virus utilizes the  
457 TMPRSS2-independent and cathepsin-dependent endosomal entry pathway (42,44,48), which  
458 likely does not require the S cleavage at S1/S2 (43) and thus prefers replication of the FCS  
459 region deletion mutants.

460       Importantly, the deletion of QTQTN (mut-del2) diminished SARS-CoV-2 entry and  
461 infection in Vero-E6 cells (40). Furthermore, three FCS-related deletion mutants,  $\Delta$ PRRA↓,  
462  $\Delta$ RAR↓SVAS, and  $\Delta$ NSPRRAR↓SVA, have been shown to have reduced replication in vitro and  
463 lung disease in animal models (44,49,50), strongly supporting that the FCS is a virulence-  
464 related motif. Since the  $\Delta$ QTQTN also abolished the furin cleavage (40), we speculate mut-del2  
465 mutant should have reduced lung disease in animals as well. Since the FCS is a key motif  
466 related to virulence, it is important to investigate the natural occurrence rate of the FCS region

467 deletions, possibility or limitation of their human-to-human transmission, as well as their  
468 pathogenicity. Several studies tried to screen the FCS region deletions from patients-derived  
469 SARS-CoV-2. As discussed above, screening of 27 SARS-CoV-2 positive clinical specimens,  
470 including one specimen that had FCS deletions identified after passaging in Vero-E6 cells, failed  
471 to detect any FCS deletions (33). However, one study detected the <sup>675</sup>QTQTN<sup>679</sup>-deleted  
472 mutants (mut-del2) in 3 of 68 SARS-CoV-2 positive clinical specimens (32). In another detection  
473 of 51 SARS-CoV-2 positive patient specimens, although a high rate of 52.9% and 82.4% of the  
474 positive clinical samples contained the FCS upstream motif (<sup>661</sup>ECDIPIGAG<sup>669</sup>) and the PRRA  
475 deletions, respectively, the mutant population is at a very low level (0.33% ±1.17% for FCS  
476 upstream motif deletion and 1.12% ±1.21% for PRRA deletion) (51), arguing the infectivity and  
477 transmissibility of these mutants.

478         Along with the usages of antibody drugs and the wide inoculation of the vaccine, which  
479 target the S protein, the virus may undergo further mutations under the pressure of human  
480 immune response. Supervision and screening the mutations in the S protein gene in clinical  
481 specimens is extremely important to identify the escaped isolates which may increase or  
482 decrease infectivity and transmissibility. Apparently, the in vitro polarized HAE model, which can  
483 facilitate long-term infection of SARS-CoV-2, is an ideal model to study S gene mutants under  
484 various conditions.

485

486

### **Acknowledgments**

487         We thank the Cells and Tissue Core of Center for Gene Therapy, the University of Iowa  
488 (DK054759) for providing the primary cell cultures. The following reagent was deposited by the  
489 Centers for Disease Control and Prevention and obtained through BEI Resources, NIAID, NIH:  
490 SARS-Related Coronavirus 2, Isolate USA-WA1/2020, NR-52281. The study was supported by  
491 PHS grant AI150877 and an internal award from University of Kansas Medical Center.

492

493

### Conflict of interests

494

Elizabeth Yan Zhang-Chen is the Founder of GeneGoCell Inc.

495

496

### References

497

1. **Hui, D. S., I. Azhar, T. A. Madani, F. Ntoumi, R. Kock, O. Dar, G. Ippolito, T. D. Mchugh, Z. A. Memish, C. Drosten, A. Zumla, and E. Petersen.** 2020. The continuing 2019-nCoV epidemic threat of novel coronaviruses to global health - The latest 2019 novel coronavirus outbreak in Wuhan, China. *Int.J Infect.Dis.* **91**:264-266.

498

499

500

501

2. **Zhou, P., X. L. Yang, X. G. Wang, B. Hu, L. Zhang, W. Zhang, H. R. Si, Y. Zhu, B. Li, C. L. Huang, H. D. Chen, J. Chen, Y. Luo, H. Guo, R. D. Jiang, M. Q. Liu, Y. Chen, X. R. Shen, X. Wang, X. S. Zheng, K. Zhao, Q. J. Chen, F. Deng, L. L. Liu, B. Yan, F. X. Zhan, Y. Y. Wang, G. F. Xiao, and Z. L. Shi.** 2020. A pneumonia outbreak associated with a new coronavirus of probable bat origin. *Nature.* **579**:270-273.

502

503

504

505

506

3. **Zhu, N., D. Zhang, W. Wang, X. Li, B. Yang, J. Song, X. Zhao, B. Huang, W. Shi, R. Lu, P. Niu, F. Zhan, X. Ma, D. Wang, W. Xu, G. Wu, G. F. Gao, and W. Tan.** 2020. A Novel Coronavirus from Patients with Pneumonia in China, 2019. *N.Engl.J Med.* **382**:727-733.

507

508

509

510

4. **Krishnan, A., J. P. Hamilton, S. A. Alqahtani, and T. A. Woreta.** 2021. COVID-19: An overview and a clinical update. *World J Clin.Cases.* **9**:8-23.

511

512

5. **Lamb, Y. N.** 2020. Remdesivir: First Approval. *Drugs.* **80**:1355-1363.

513

6. **Chung, J. Y., M. N. Thone, and Y. J. Kwon.** 2020. COVID-19 vaccines: The status and perspectives in delivery points of view. *Adv.Drug Deliv.Rev.* **10**.

514

515

7. **Coronaviridae Study Group of the International Committee on Taxonomy of Viruses.** 2020. The species Severe acute respiratory syndrome-related coronavirus: classifying 2019-nCoV and naming it SARS-CoV-2. *Nat.Microbiol.* **5**:536-544.

516

517

518

8. **Wu, Y., W. Ho, Y. Huang, D. Y. Jin, S. Li, S. L. Liu, X. Liu, J. Qiu, Y. Sang, Q. Wang, K. Y. Yuen, and Z. M. Zheng.** 2020. SARS-CoV-2 is an appropriate name for the new coronavirus. *Lancet.* **395**:949-950.

519

520

521

9. **Lu, R., X. Zhao, J. Li, P. Niu, B. Yang, H. Wu, W. Wang, H. Song, B. Huang, N. Zhu, Y. Bi, X. Ma, F. Zhan, L. Wang, T. Hu, H. Zhou, Z. Hu, W. Zhou, L. Zhao, J. Chen, Y. Meng, J. Wang, Y. Lin, J. Yuan, Z. Xie, J. Ma, W. J. Liu, D. Wang, W. Xu, E. C. Holmes, G. F. Gao, G. Wu, W. Chen, W. Shi, and W. Tan.** 2020. Genomic characterisation and epidemiology of 2019 novel coronavirus: implications for virus origins and receptor binding. *Lancet.* **395**:565-574.

522

523

524

525

526

527

10. **Chan, J. F., K. H. Kok, Z. Zhu, H. Chu, K. K. To, S. Yuan, and K. Y. Yuen.** 2020. Genomic characterization of the 2019 novel human-pathogenic coronavirus isolated from a patient with atypical pneumonia after visiting Wuhan. *Emerg.Microbes.Infect.* **9**:221-236.

528

529

530

- 531 11. **Lee, N., D. Hui, A. Wu, P. Chan, P. Cameron, G. M. Joynt, A. Ahuja, M. Y. Yung, C.**  
532 **B. Leung, K. F. To, S. F. Lui, C. C. Szeto, S. Chung, and J. J. Sung.** 2003. A major  
533 outbreak of severe acute respiratory syndrome in Hong Kong. *N.Engl.J Med.* **348**:1986-  
534 1994.
- 535 12. **Drosten, C., S. Gunther, W. Preiser, S. van der Werf, H. R. Brodt, S. Becker, H.**  
536 **Rabenau, M. Panning, L. Kolesnikova, R. A. Fouchier, A. Berger, A. M. Burguiere,**  
537 **J. Cinatl, M. Eickmann, N. Escriou, K. Grywna, S. Kramme, J. C. Manuguerra, S.**  
538 **Muller, V. Rickerts, M. Sturmer, S. Vieth, H. D. Klenk, A. D. Osterhaus, H. Schmitz,**  
539 **and H. W. Doerr.** 2003. Identification of a novel coronavirus in patients with severe  
540 acute respiratory syndrome. *N.Engl.J Med.* **348**:1967-1976.
- 541 13. **Miao, Z., A. Tidu, G. Eriani, and F. Martin.** 2020. Secondary structure of the SARS-  
542 CoV-2 5'-UTR. *RNA.Biol.*1-10.
- 543 14. **Zhao, J., J. Qiu, S. Aryal, J. L. Hackett, and J. Wang.** 2020. The RNA Architecture of  
544 the SARS-CoV-2 3'-Untranslated Region. *Viruses.* **12**:E1473.
- 545 15. **Kim, D., J. Y. Lee, J. S. Yang, J. W. Kim, V. N. Kim, and H. Chang.** 2020. The  
546 Architecture of SARS-CoV-2 Transcriptome. *Cell.* **181**:914-921.
- 547 16. **Irigoyen, N., A. E. Firth, J. D. Jones, B. Y. Chung, S. G. Siddell, and I. Brierley.**  
548 2016. High-Resolution Analysis of Coronavirus Gene Expression by RNA Sequencing  
549 and Ribosome Profiling. *PLoS.Pathog.* **12**:e1005473.
- 550 17. **Davidson, A. D., M. K. Williamson, S. Lewis, D. Shoemark, M. W. Carroll, K. J.**  
551 **Heesom, M. Zambon, J. Ellis, P. A. Lewis, J. A. Hiscox, and D. A. Matthews.** 2020.  
552 Characterisation of the transcriptome and proteome of SARS-CoV-2 reveals a cell  
553 passage induced in-frame deletion of the furin-like cleavage site from the spike  
554 glycoprotein. *Genome Med.* **12**:68-00763.
- 555 18. **Sawicki, S. G., D. L. Sawicki, and S. G. Siddell.** 2007. A contemporary view of  
556 coronavirus transcription. *J Virol.* **81**:20-29.
- 557 19. **Sola, I., F. Almazan, S. Zuuiga, and L. Enjuanes.** 2015. Continuous and Discontinuous  
558 RNA Synthesis in Coronaviruses. *Annu.Rev.Virol.* **2**:265-288.
- 559 20. **Zúñiga, S., I. Sola, S. Alonso, and L. Enjuanes.** 2004. Sequence motifs involved in the  
560 regulation of discontinuous coronavirus subgenomic RNA synthesis. *J Virol.* **78**:980-994.
- 561 21. **V'kovski, P., A. Kratzel, S. Steiner, H. Stalder, and V. Thiel.** 2020. Coronavirus  
562 biology and replication: implications for SARS-CoV-2. *Nat.Rev.Microbiol.*1-16.
- 563 22. **Fehr, A. R. and S. Perlman.** 2015. Coronaviruses: an overview of their replication and  
564 pathogenesis. *Methods Mol.Biol.* **1282**:1-23. doi: [10.1007/978-1-4939-2438-7\\_1](https://doi.org/10.1007/978-1-4939-2438-7_1):1-23.
- 565 23. **Li, F.** 2016. Structure, Function, and Evolution of Coronavirus Spike Proteins.  
566 *Annu.Rev.Virol.* **3**:237-261.
- 567 24. **Hu, B., H. Guo, P. Zhou, and Z. L. Shi.** 2020. Characteristics of SARS-CoV-2 and  
568 COVID-19. *Nat.Rev.Microbiol.*1-14.

- 569 25. **Shang, J., Y. Wan, C. Luo, G. Ye, Q. Geng, A. Auerbach, and F. Li.** 2020. Cell entry  
570 mechanisms of SARS-CoV-2. *Proc.Natl.Acad.Sci.U.S.A.* **117**:11727-11734.
- 571 26. **Hoffmann, M., H. Kleine-Weber, S. Schroeder, N. Krüger, T. Herrler, S. Erichsen, T.**  
572 **S. Schiergens, G. Herrler, N. H. Wu, A. Nitsche, M. A. Mülle, C. Drosten, and S.**  
573 **Pöhlmann.** 2020. SARS-CoV-2 Cell Entry Depends on ACE2 and TMPRSS2 and Is  
574 Blocked by a Clinically Proven Protease Inhibitor. *Cell.* **181**:271-280.
- 575 27. **Hoffmann, M., H. Kleine-Weber, and S. Pöhlmann.** 2020. A Multibasic Cleavage Site  
576 in the Spike Protein of SARS-CoV-2 Is Essential for Infection of Human Lung Cells.  
577 *Mol.Cell.* **78**:779-784.
- 578 28. **Zhou, H., X. Chen, T. Hu, J. Li, H. Song, Y. Liu, P. Wang, D. Liu, J. Yang, E. C.**  
579 **Holmes, A. C. Hughes, Y. Bi, and W. Shi.** 2020. A Novel Bat Coronavirus Closely  
580 Related to SARS-CoV-2 Contains Natural Insertions at the S1/S2 Cleavage Site of the  
581 Spike Protein. *Curr.Biol.* **30**:2196-2203.
- 582 29. **Jaimes, J. A., J. K. Millet, and G. R. Whittaker.** 2020. Proteolytic Cleavage of the  
583 SARS-CoV-2 Spike Protein and the Role of the Novel S1/S2 Site. *iScience.* **23**:101212.
- 584 30. **Coutard, B., C. Valle, L. de, X. B. Canard, N. G. Seidah, and E. Decroly.** 2020. The  
585 spike glycoprotein of the new coronavirus 2019-nCoV contains a furin-like cleavage site  
586 absent in CoV of the same clade. *Antiviral Res.* **176**:104742.
- 587 31. **Klimstra, W. B., N. L. Tilston-Lunel, S. Nambulli, J. Boslett, C. M. McMillen, T.**  
588 **Gilliland, M. D. Dunn, C. Sun, S. E. Wheeler, A. Wells, A. L. Hartman, A. K. McElroy,**  
589 **D. S. Reed, L. J. Rennick, and W. P. Duprex.** 2020. SARS-CoV-2 growth, furin-  
590 cleavage-site adaptation and neutralization using serum from acutely infected  
591 hospitalized COVID-19 patients. *J Gen.Virol.* **101**:1156-1169.
- 592 32. **Liu, Z., H. Zheng, H. Lin, M. Li, R. Yuan, J. Peng, Q. Xiong, J. Sun, B. Li, J. Wu, L.**  
593 **Yi, X. Peng, H. Zhang, W. Zhang, R. J. G. Hulswit, N. Loman, A. Rambaut, C. Ke, T.**  
594 **A. Bowden, O. G. Pybus, and J. Lu.** 2020. Identification of Common Deletions in the  
595 Spike Protein of Severe Acute Respiratory Syndrome Coronavirus 2. *J Virol.* **94**:e00790-  
596 20.
- 597 33. **Lau, S. Y., P. Wang, B. W. Mok, A. J. Zhang, H. Chu, A. C. Lee, S. Deng, P. Chen, K.**  
598 **H. Chan, W. Song, Z. Chen, K. K. To, J. F. Chan, K. Y. Yuen, and H. Chen.** 2020.  
599 Attenuated SARS-CoV-2 variants with deletions at the S1/S2 junction.  
600 *Emerg.Microbes.Infect.* **9**:837-842.
- 601 34. **Ogando, N. S., T. J. Dalebout, J. C. Zevenhoven-Dobbe, R. W. A. L. Limpens, Y.**  
602 **van der Meer, L. Caly, J. Druce, J. J. C. de Vries, M. Kikkert, M. Bárcena, I. Idorov,**  
603 **and E. J. Nijder.** 2020. SARS-coronavirus-2 replication in Vero E6 cells: replication  
604 kinetics, rapid adaptation and cytopathology. *J Gen.Virol.* **101**:925-940.
- 605 35. **Zhu, N., W. Wang, Z. Liu, C. Liang, W. Wang, F. Ye, B. Huang, L. Zhao, H. Wang, W.**  
606 **Zhou, Y. Deng, L. Mao, C. Su, G. Qiang, T. Jiang, J. Zhao, G. Wu, J. Song, and W.**  
607 **Tan.** 2020. Morphogenesis and cytopathic effect of SARS-CoV-2 infection in human  
608 airway epithelial cells. *Nat.Comm.* **11**:3910-17796.

- 609 36. **Hao, S., K. Ning, C. A. Kuz, K. Vorhies, Z. Yan, and J. Qiu.** 2020. Long-Term  
610 Modeling of SARS-CoV-2 Infection of In Vitro Cultured Polarized Human Airway  
611 Epithelium. *MBio.* **11**:e02852-20.
- 612 37. **Sethna, P. B., M. A. Hofmann, and D. A. Brian.** 1991. Minus-strand copies of  
613 replicating coronavirus mRNAs contain antileaders. *J Virol.* **65**:320-325.
- 614 38. **Harilal, D., S. Ramaswamy, T. Loney, H. A. Suwaidi, H. Khansaheb, A. Alkhaja, R.**  
615 **Varghese, Z. Deesi, N. Nowotny, A. Alsheikh-Ali, and T. A. Abou.** 2020. SARS-CoV-  
616 2 Whole Genome Amplification and Sequencing for Effective Population-Based  
617 Surveillance and Control of Viral Transmission. *Clin.Chem.* **66**:1450-1458.
- 618 39. **Butler, D. J., C. Mozsary, C. Meydan, D. Danko, J. Foon, J. Rosiene, A. Shaiber, E.**  
619 **Afshinnekoo, M. MacKay, F. J. Sedlizeck, N. A. Ivanov, M. Sierra, D. Pohle, M.**  
620 **Zietz, U. Gisladdottir, V. Ramlall, C. D. Westover, K. Ryon, B. Young, C.**  
621 **Bhattacharya, P. Ruggiero, B. W. Langhorst, N. Tanner, J. Gawrys, D. Meleshko, D.**  
622 **Xu, P. A. D. Steel, A. J. Shemesh, J. Xiang, J. Thierry-Mieg, D. Thierry-Mieg, R. E.**  
623 **Schwartz, A. Iftner, D. Bezdán, J. Siple, L. Cong, A. Craney, P. Velu, A. M.**  
624 **Melnick, I. Hajirasouliha, S. M. Horner, T. Iftner, M. Salvatore, M. Loda, L. F.**  
625 **Westblade, M. Cushing, S. Levy, S. Wu, N. Tatonetti, M. Imielinski, H. Rennert, and**  
626 **C. E. Mason.** 2020. Shotgun Transcriptome and Isothermal Profiling of SARS-CoV-2  
627 Infection Reveals Unique Host Responses, Viral Diversification, and Drug Interactions.  
628 *bioRxiv.* doi:10.1101/2020.04.20.048066.
- 629 40. **Cantuti-Castelvetri, L., R. Ojha, L. D. Pedro, M. Djannatian, J. Franz, S. Kuivanen,**  
630 **F. van der Meer, K. Kallio, T. Kaya, M. Anastasina, T. Smura, L. Levanov, L.**  
631 **Szirovicza, A. Tobi, H. Kallio-Kokko, P. Österlund, M. Joensuu, F. A. Meunier, S. J.**  
632 **Butcher, M. S. Winkler, B. Mollenhauer, A. Helenius, O. Gokce, T. Teesalu, J.**  
633 **Hepojoki, O. Vapalahti, C. Stadelmann, G. Balistreri, and M. Simons.** 2020.  
634 Neuropilin-1 facilitates SARS-CoV-2 cell entry and infectivity. *Science.* **370**:856-860.
- 635 41. **Hoffmann, M., H. Kleine-Weber, S. Schroeder, N. Kruger, T. Herrler, S. Erichsen, T.**  
636 **S. Schiergens, G. Herrler, N. H. Wu, A. Nitsche, M. A. Müller, C. Drosten, and S.**  
637 **Pohlmann.** 2020. SARS-CoV-2 Cell Entry Depends on ACE2 and TMPRSS2 and Is  
638 Blocked by a Clinically Proven Protease Inhibitor. *Cell.* **181**:271-280.
- 639 42. **Sasaki, M., K. Uemura, A. Sato, S. Toba, T. Sanaki, K. Maenaka, W. W. Hall, Y.**  
640 **Orba, and H. Sawa.** 2021. SARS-CoV-2 variants with mutations at the S1/S2 cleavage  
641 site are generated in vitro during propagation in TMPRSS2-deficient cells. *PLoS.Pathog.*  
642 **17**:e1009233.
- 643 43. **Tang, T., J. A. Jaimes, M. K. Bidon, M. R. Straus, S. Daniel, and G. R. Whittaker.**  
644 2021. Proteolytic Activation of SARS-CoV-2 Spike at the S1/S2 Boundary: Potential Role  
645 of Proteases beyond Furin. *ACS Infect.Dis.* doi:10.1021/acsinfecdis.0c00701. Online  
646 ahead of print.
- 647 44. **Zhu, Y., F. Feng, G. Hu, Y. Wang, Y. Yu, Y. Zhu, W. Xu, W. Cai, Z. Sun, W. Han, R.**  
648 **Ye, H. Chen, Q. Ding, Q. Cai, D. Qu, Y. Xie, Z. Yuan, and Zhang R.** 2020. The S1/S2  
649 boundary of SARS-CoV-2 spike protein modulates cell entry pathways and transmission.  
650 *BioRxiv.* <https://doi.org/10.1101/2020.08.25.266775>.

- 651 45. **Ren, X., J. Glende, M. Al-Falah, V. de, V, C. Schwegmann-Wessels, X. Qu, L. Tan, T.**  
652 **Tschernig, H. Deng, H. Y. Naim, and G. Herrler.** 2006. Analysis of ACE2 in polarized  
653 epithelial cells: surface expression and function as receptor for severe acute respiratory  
654 syndrome-associated coronavirus. *J Gen.Virol.* **87**:1691-1695.
- 655 46. **Böttcher-Friebertshäuse, E., D. A. Stein, H. D. Klenk, and W. Garten.** 2011. Inhibition  
656 of influenza virus infection in human airway cell cultures by an antisense peptide-  
657 conjugated morpholino oligomer targeting the hemagglutinin-activating protease  
658 TMPRSS2. *J Virol.* **85**:1554-1562.
- 659 47. **Ziegler, C. G. K., S. J. Allon, S. K. Nyquist, I. M. Mbanjo, V. N. Miao, C. N. Tzouanas,**  
660 **Y. Cao, A. S. Yousif, J. Bals, B. M. Hauser, J. Feldman, C. Muus, M. H. Wadsworth,**  
661 **S. W. Kazer, T. K. Hughes, B. Doran, G. J. Gatter, M. Vukovic, F. Taliaferro, B. E.**  
662 **Mead, Z. Guo, J. P. Wang, D. Gras, M. Plaisant, M. Ansari, I. Angelidis, H. Adler, J.**  
663 **M. S. Sucre, C. J. Taylor, B. Lin, A. Waghray, V. Mitsialis, D. F. Dwyer, K. M.**  
664 **Buchheit, J. A. Boyce, N. A. Barrett, T. M. Laidlaw, S. L. Carroll, L. Colonna, V.**  
665 **Tkachev, C. W. Peterson, A. Yu, H. B. Zheng, H. P. Gideon, C. G. Winchell, P. L.**  
666 **Lin, C. D. Bingle, S. B. Snapper, J. A. Kropf, F. J. Theis, H. B. Schiller, L. E.**  
667 **Zaragosi, P. Barbry, A. Leslie, H. P. Kiem, J. L. Flynn, S. M. Fortune, B. Berger, R.**  
668 **W. Finberg, L. S. Kean, M. Garber, A. G. Schmidt, D. Lingwood, A. K. Shalek, and J.**  
669 **Ordoñez-Montanes.** 2020. SARS-CoV-2 Receptor ACE2 Is an Interferon-Stimulated  
670 Gene in Human Airway Epithelial Cells and Is Detected in Specific Cell Subsets across  
671 Tissues. *Cell.* **181**:1016-1035.
- 672 48. **Tang, T., M. Bidon, J. A. Jaimes, G. R. Whittaker, and S. Daniel.** 2020. Coronavirus  
673 membrane fusion mechanism offers a potential target for antiviral development. *Antiviral*  
674 *Res.* **178**:104792.
- 675 49. **Johnson, B. A., X. Xie, A. L. Bailey, B. Kalveram, K. G. Lokugamage, A. Muruato, J.**  
676 **Zou, X. Zhang, T. Juelich, J. K. Smith, L. Zhang, N. Bopp, C. Schindewolf, M. Vu, A.**  
677 **Vanderheiden, E. S. Winkler, D. Swetnam, J. A. Plante, P. Aguilar, K. S. Plante, V.**  
678 **Popov, B. Lee, S. C. Weaver, M. S. Suthar, A. L. Routh, P. Ren, Z. Ku, Z. An, K.**  
679 **Debbink, M. S. Diamond, P. Y. Shi, A. N. Freiberg, and V. D. Menachery.** 2021. Loss  
680 of furin cleavage site attenuates SARS-CoV-2 pathogenesis. *Nature*.10-03237.
- 681 50. **Wan, P., S. Y. Lau, S. Deng, P. Chen, B. W. Mok, A. J. Zhang, A. C. Lee, K. H. Chan,**  
682 **W. Song, K. K. To, J. F. Chan, K. Y. Yuen, H. Chen, and et al.** 2020. Pathogenicity,  
683 immunogenicity, and protective ability of an attenuated SARS-CoV-2 variant with a  
684 deletion at the S1/S2 junction of the spike protein. *BioRxiv*.  
685 <https://doi.org/10.1101/2020.08.24.264192>.
- 686 51. **Wong, Y. C., S. Y. Lau, Wang To KK, B. W. Y. Mok, X. Li, P. Wang, S. Deng, K. F.**  
687 **Woo, Z. Du, C. Li, J. Zhou, J. F. Woo Chan, K. Y. Yuen, H. Chen, and Z. Chen.** 2020.  
688 Natural transmission of bat-like SARS-CoV-2 $\Delta$ PRRA variants in COVID-19 patients.  
689 *Clin.Infect.Dis.* doi:10.1093/cid/ciaa953.  
690  
691  
692  
693

694

## Figure Legends

### 695 **Fig. 1. Immunofluorescence analysis of SARS-CoV-2 infection of HAE cells.**

696 HAE-ALI<sup>B2-20</sup> cultures were infected with SARS-CoV-2 at an MOI of 0.2 or 2 pfu/cell, as  
697 indicated, mock-infected (Mock). At 4 days post-infection, a piece of the insert membrane was  
698 fixed in 4% paraformaldehyde in PBS at 4°C overnight. and subjected to direct  
699 immunofluorescence analysis. The membranes were stained with anti-SARS-CoV-2 N protein  
700 (NP). Images were taken on a Leica TCS SPE confocal microscope under 40×, which was  
701 controlled by Leica Application Suite X software. The nuclei were stained with DAPI (4',6-  
702 diamidino-2-phenylindole). Scale bar is 20 μM.

703

### 704 **Fig. 2. Genome coverage of SARS-CoV-2 infected HAE cells with MOIs of 0.2 and 2,** 705 **respectively.**

706 Six total RNA samples, as indicated with six colors, extracted from HAE-ALI<sup>B2-20</sup> cultures  
707 infected with SARS-CoV-2 with at MOIs of 0.2 and 2, respectively, were subjected to whole  
708 RNA-seq. The reads were mapped to the reference SARS-CoV-2 Wuhan-Hu-1 strain genome  
709 (MN908947, NCBI), as shown with nucleotide numbers (X axis), using BWA and the sequencing  
710 read coverage (Y axis) was calculated.

711

### 712 **Fig. 3. Identification and quantification of SARS-CoV-2 subgenomic RNAs.**

713 **(A) Genome organization.** The SARS-CoV-2 genome is schematically diagrammed  
714 (not to scale) with regions in order coding for open reading frame 1a (ORF1a)/ORF1b, S  
715 protein, ORF3a, E and M proteins, ORF7a/b and ORF8, N protein, and ORF9a/b. The leader  
716 sequence was labeled as L in blue box. The structural genes are labeled within boxes in orange  
717 and the accessory genes are labeled within boxes in light green. **(B) Subgenomic RNAs.** Six  
718 total RNA samples were extracted from SARS-CoV-2 infected HAE-ALI cultures (at MOIs of 0.2  
719 and 2, respectively) and subjected to whole RNA-seq. Three repeats in each MOI group were



720 merged. Junction-spanning reads were identified using STAR (2.7.3a), and the transcript  
721 abundance, as shown in % under HAE-ALI/MOI 0.2 or 2, was estimated by counting the reads  
722 that span the junction of the corresponding RNA transcript. The left is the diagrammed  
723 subgenomic RNAs. The canonical junction-spanning reads related to each sgRNA were  
724 calculated and the ratios are shown on right. The abundances of the subgenomic transcripts  
725 identified in Vero cells in a previous study (15) are listed for comparison.

726

727 **Fig. 4. Features of the S gene of SARS-CoV-2 and the deletions detected in the FCS**  
728 **region.**

729 **(A) S gene and FCS.** Key domains of the S polypeptide are diagrammed in the context  
730 of the SARS-CoV-2 genome. The S1 protein, receptor binding unit, harbors N-terminal domain  
731 (NTD) and receptor binding domain (RBD) subunit, which is conserved and recognizes ACE2.  
732 The S2, membrane fusion subunit, has fusion peptide (FP), S2' proteolytic site, two heptad-  
733 repeats, HR1 and HR2, and a transmembrane domain (TM) followed by cytoplasmic peptide  
734 (CP) (30). The S protein has acquired a polybasic site (RRAR↓S, a furin cleavage site, FCS) for  
735 cleavage at S1/S2 boundary. An FCS region of aa670-695, together with the two key deletions  
736 mut-del1 ( $\Delta$ FCS1) and mut-del2 ( $\Delta$ FCS2), are shown with S amino acid sequences of the  
737 SARS-CoV-2 genome (GenBank, accession code MN908947). **(B) Coverage plots of S gene**  
738 **at nt 23,500 to 23,698 in SARS-CoV-2 infected HAE-ALI<sup>B2-20</sup>.** The coverage plots show the  
739 most abundant junction-spanning reads in SARS-CoV-2 infected HAE-ALI<sup>B2-20</sup> cultures are the  
740 36 bp and 15 bp deletions in S gene of nt 23,594-23,629 and nt 23,583-23,597, respectively,  
741 which deleted 12 aa and 5 aa shown in mut-del1 and mut-del2 in panel A. RNA Sample 5, 6,  
742 and 7 were extracted from HAE-ALI<sup>B2-20</sup> infected at an MOI of 0.2 at 4 dpi, and RNA Sample 9,  
743 10, and 11 were extracted at MOI of 2 at 4 dpi.

744

745 **Fig. 5. Apical virus release kinetics of SARS-CoV-2 infected HAE-ALI<sup>KC19</sup> culture.**

746 HAE-ALI<sup>KC19</sup> cultures were infected with SARS-CoV-2 at an MOI of 0.2 from the apical  
747 side. At the indicated days post-infection (dpi), the apical surface was washed with 300  $\mu$ l of D-  
748 PBS to collect the released viruses. Plaque-forming units (PFU) were determined (y axis) and  
749 plotted to the dpi. Values represent means  $\pm$  standard deviations (SD) (error bars).

**Table 1. Summary of RNA-seq data of SARS-CoV-2 and mock infected HAE-ALI cultures.**

| <b>Samples</b>   | <b>Total reads</b> | <b>Mapped viral reads</b> | <b>Mapped viral reads (%)</b> |
|------------------|--------------------|---------------------------|-------------------------------|
| <b>Mock-1</b>    | 44,690,289         | 0                         | 0                             |
| <b>Mock-2</b>    | 44,710,969         | 0                         | 0                             |
| <b>Mock-3</b>    | 44,661,039         | 0                         | 0                             |
| <b>MOI 0.2-1</b> | 44,665,846         | 9,109,261                 | 20.39                         |
| <b>MOI 0.2-2</b> | 44,606,709         | 9,446,219                 | 21.18                         |
| <b>MOI 0.2-3</b> | 44,625,565         | 5,907,458                 | 13.24                         |
| <b>MOI 2-1</b>   | 44,622,724         | 14,536,455                | 32.58                         |
| <b>MOI 2-2</b>   | 44,658,564         | 12,466,502                | 27.92                         |
| <b>MOI 2-3</b>   | 44,616,157         | 8,529,469                 | 19.12                         |

**Table 2. Ratio of reads covering mut-del1 and mut-del2 to total junction spanning reads and viral genome.**

|                 | Junction-spanning reads (%) <sup>a</sup> |       | Viral genome ratio (%) <sup>b</sup> |       |
|-----------------|------------------------------------------|-------|-------------------------------------|-------|
|                 | MOI 0.2                                  | MOI 2 | MOI 0.2                             | MOI 2 |
| <b>Mut-del1</b> | 21.04                                    | 14.79 | 69.02                               | 20.02 |
| <b>Mut-del2</b> | 0.42                                     | 15.11 | 1.11                                | 15.75 |

Note: a, the minimal size of the junctions was set 10 as described in Materials and Methods. b, the total reads include both viral genome RNA (gRNA) and subgenomic RNA (sgRNA).

**Table 3. Summary of the detections of mut-del1 and mut-del2 in stock viruses and apical washes of SARS-CoV-2 infected HAE-ALI cultures derived from different donors.**

| Virus or donor  | dpi (source)    | Mut-del1    |             | Mut-del2    |             |
|-----------------|-----------------|-------------|-------------|-------------|-------------|
|                 |                 | RNA-seq (%) | PCR-seq (%) | RNA-seq (%) | PCR-seq (%) |
| <b>P0 stock</b> | (BEI)           | 0.87        | 2.03        | 2.09        | 2.45        |
| <b>P1 stock</b> | (Vero-E6)       | 21.69       | 40.47       | 5.18        | 5.16        |
| <b>B3-20</b>    | 3               | ND          |             | 23.17       |             |
|                 | 12              | ND          |             | 4.44        |             |
|                 | 20              |             | 0.00        |             | 0.57        |
| <b>B4-20</b>    | 3               | 1.08        |             | 8.33        |             |
|                 | 12              |             | 0.052       |             | 4.27        |
|                 | 13              |             | 0.033       |             | 3.90        |
|                 | 17              |             | 0.103       |             | 1.59        |
| <b>B9-20</b>    | 5               |             | 0.001       |             | 0.01        |
|                 | 11              |             | 0.064       |             | 0.09        |
|                 | 17 <sup>#</sup> |             | 0.056       |             | 0.15        |
|                 | 17 <sup>#</sup> |             | 0.024       |             | 0.07        |
| <b>KC19</b>     | 4               | 0.16        | 1.79        | 20.75       | 35.71       |
|                 | 13              | ND          |             | 20.98       |             |
|                 | 21              |             | 0.017       |             | 41.79       |
| <b>L209</b>     | 3               |             | 0.037       |             | 30.33       |
|                 | 14              |             | 0.001       |             | 0.11        |
|                 | 41              |             | 0.001       |             | 0.04        |

ND, not detected or <0.1%. # independent samples.

**Table 4. Detections of mut-del1 and mut-del2 in SARS-CoV-2 virions apically released from infected HAE-ALI cultures derived from B15-20 and B16-20 donors using PCR-seq.**

| Donor         | dpi | Mut-del 1    | Mut-del2 |
|---------------|-----|--------------|----------|
|               |     | PCR-seq      | PCR-seq  |
| <b>B15-20</b> | 3   | <b>31.87</b> | 0.18     |
|               | 13  | <b>54.22</b> | 0.69     |
| <b>B16-20</b> | 3   | 6.78         | 0.71     |
|               | 13  | 0.08         | 0.16     |

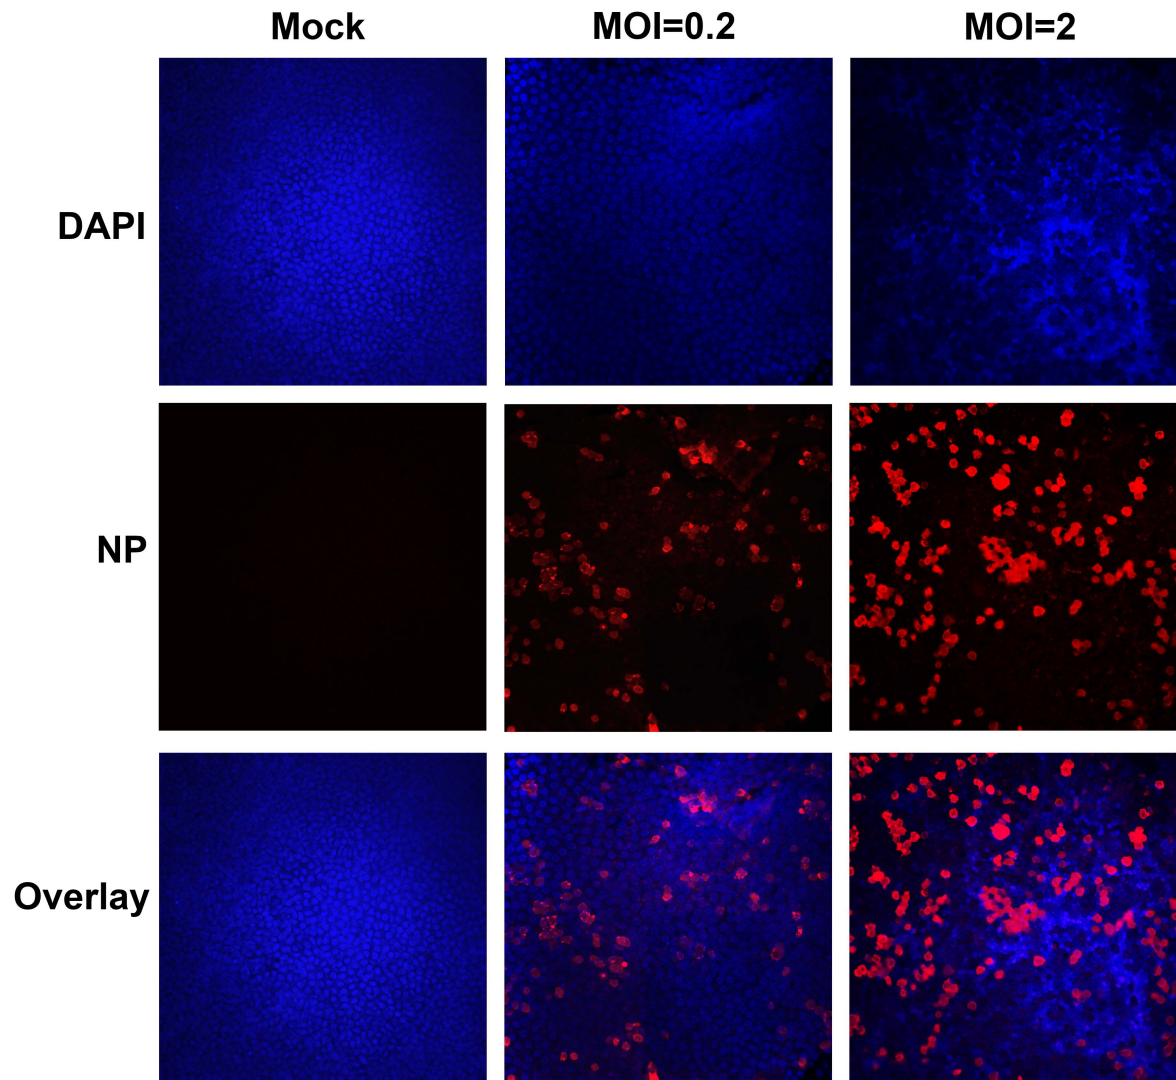

Figure 1

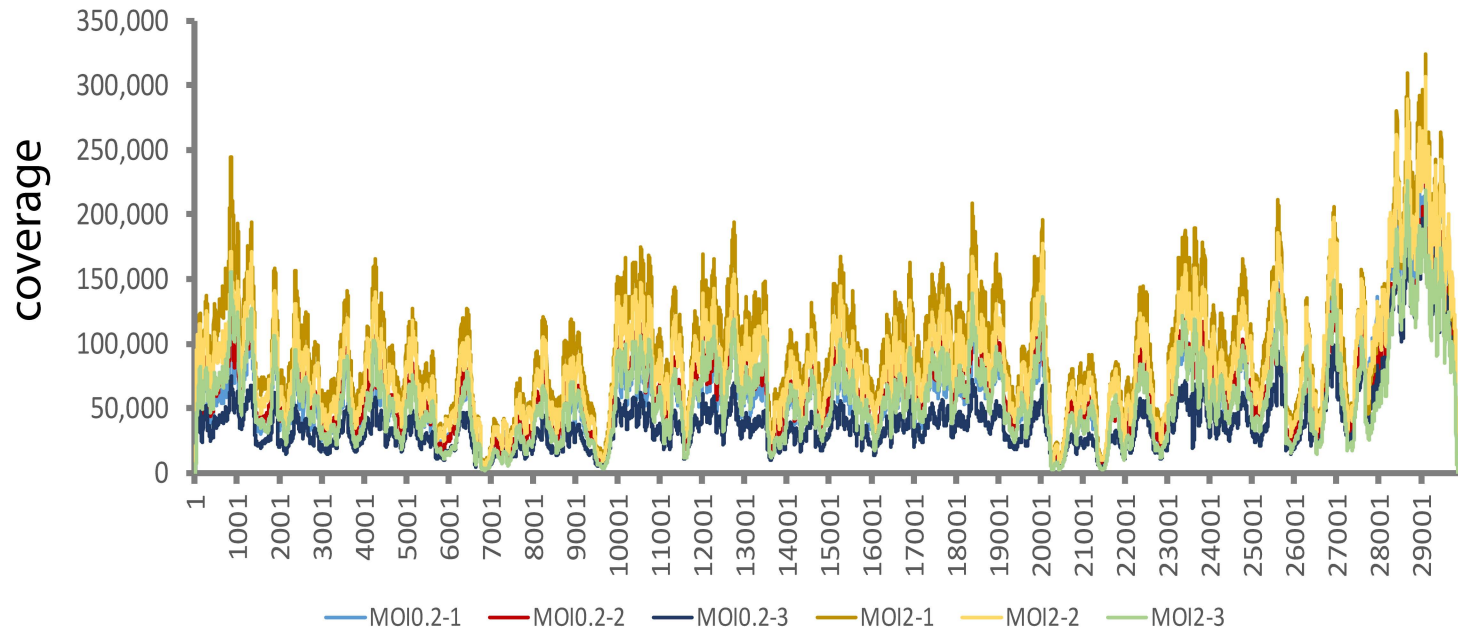

**Figure 2**



**A**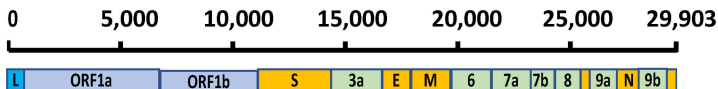**B**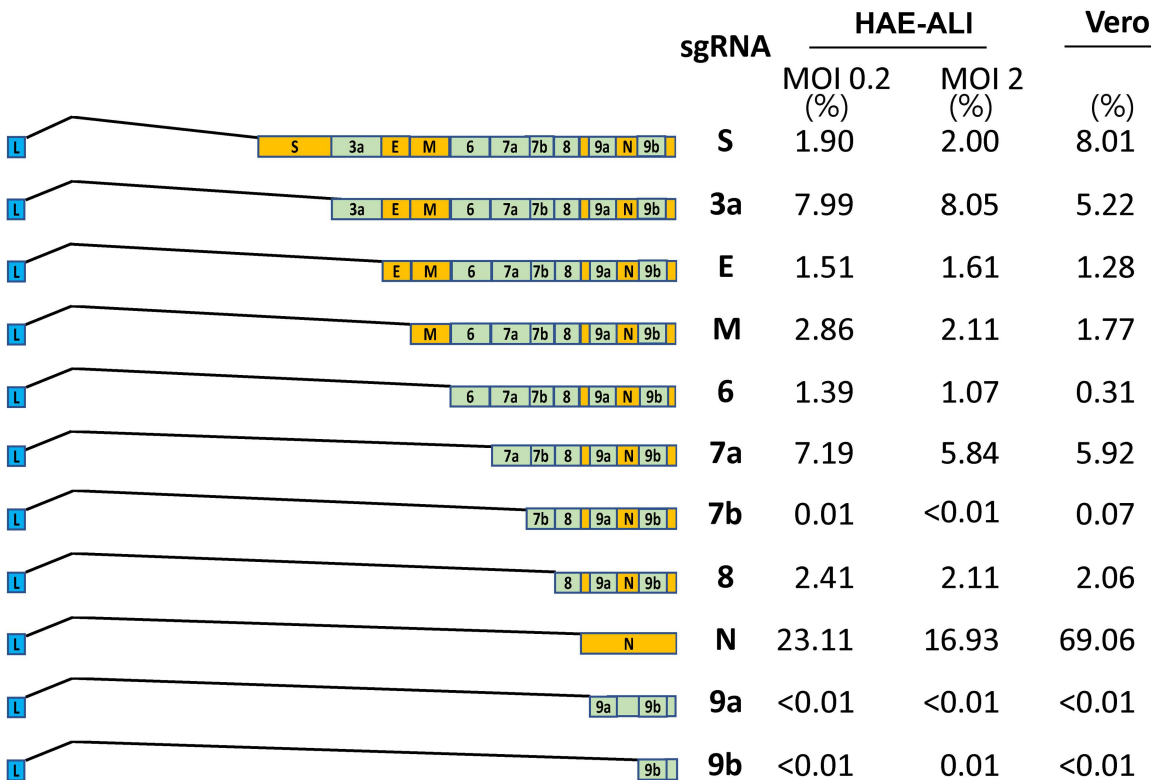**Figure 3**

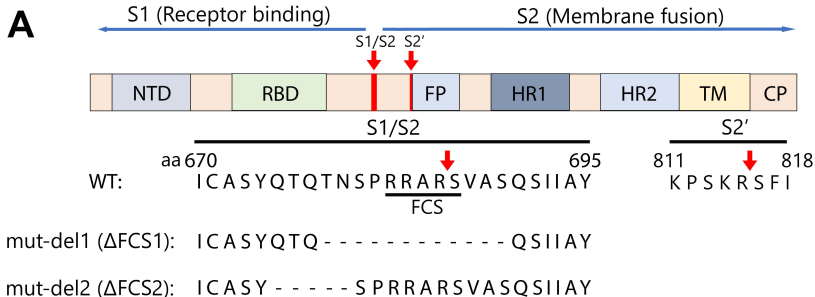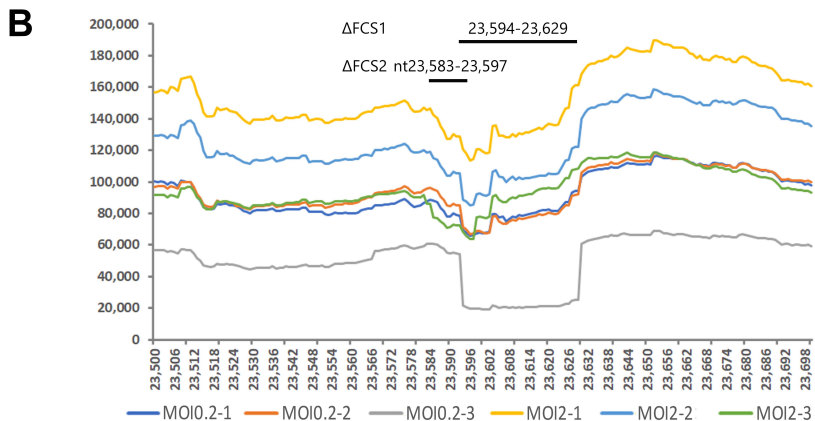

**Figure 4**

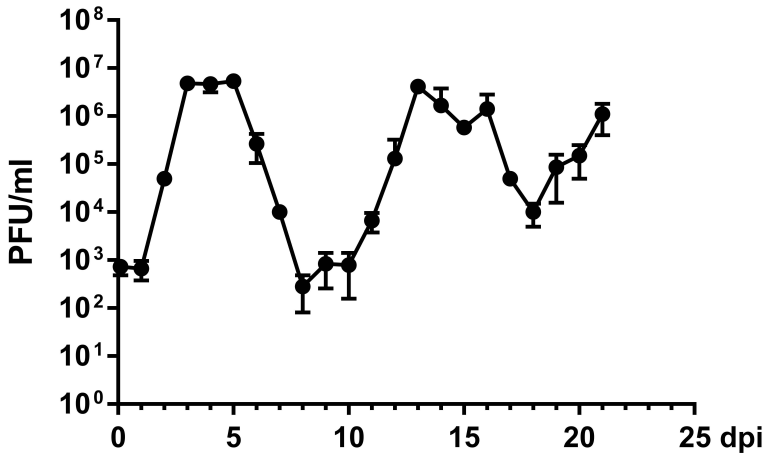

**Figure 5**
